# Supplementary material for: Thermoresponsive nanocomposites from multilayers of nanofibrillated cellulose and specially designed N-isopropylacrylamide based polymers
Source: Royal Society of Chemistry journal article supplement (doi:10.1039/b910481j), 2009-11-18
Supplement: b910481j.pdf [file b910481j.pdf]

## Supporting Information

$^1\text{H}$ -NMR of P(B30/30) block copolymer, pure PNIPAAm and the monomers NIPAAm and APTAC in deuterated DMSO.

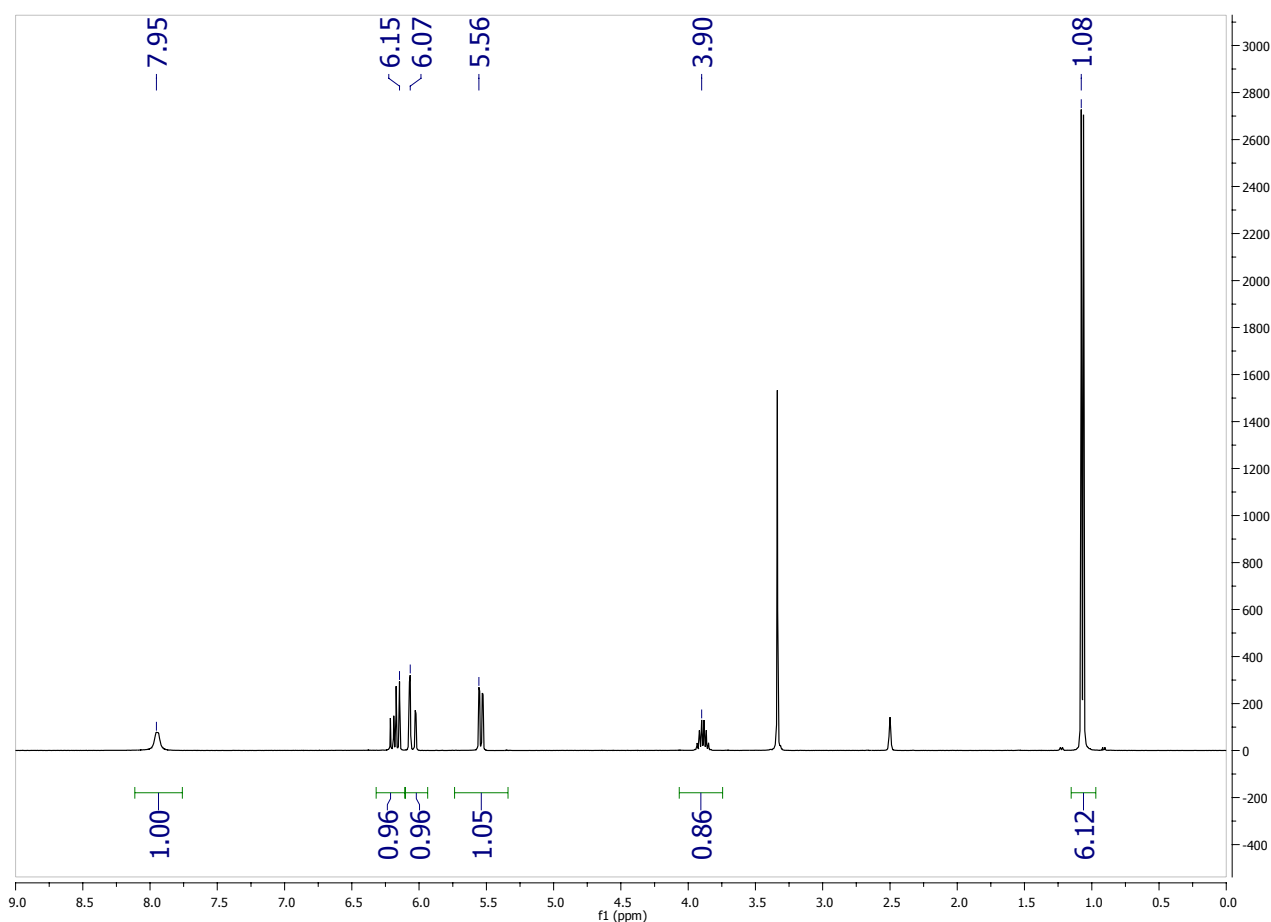

Signals of NIPAAm at 1.08 ppm ( $-\text{CH}(\text{CH}_3)_2$ ), 3.90 ppm ( $-\text{CH}(\text{CH}_3)_2$ ), 5.56 ppm and 6.07 ppm ( $\text{CH}_2=$ ), 6.15 ppm ( $=\text{CH}-$ ), 7.95 ppm ( $-\text{NH}-$ ).

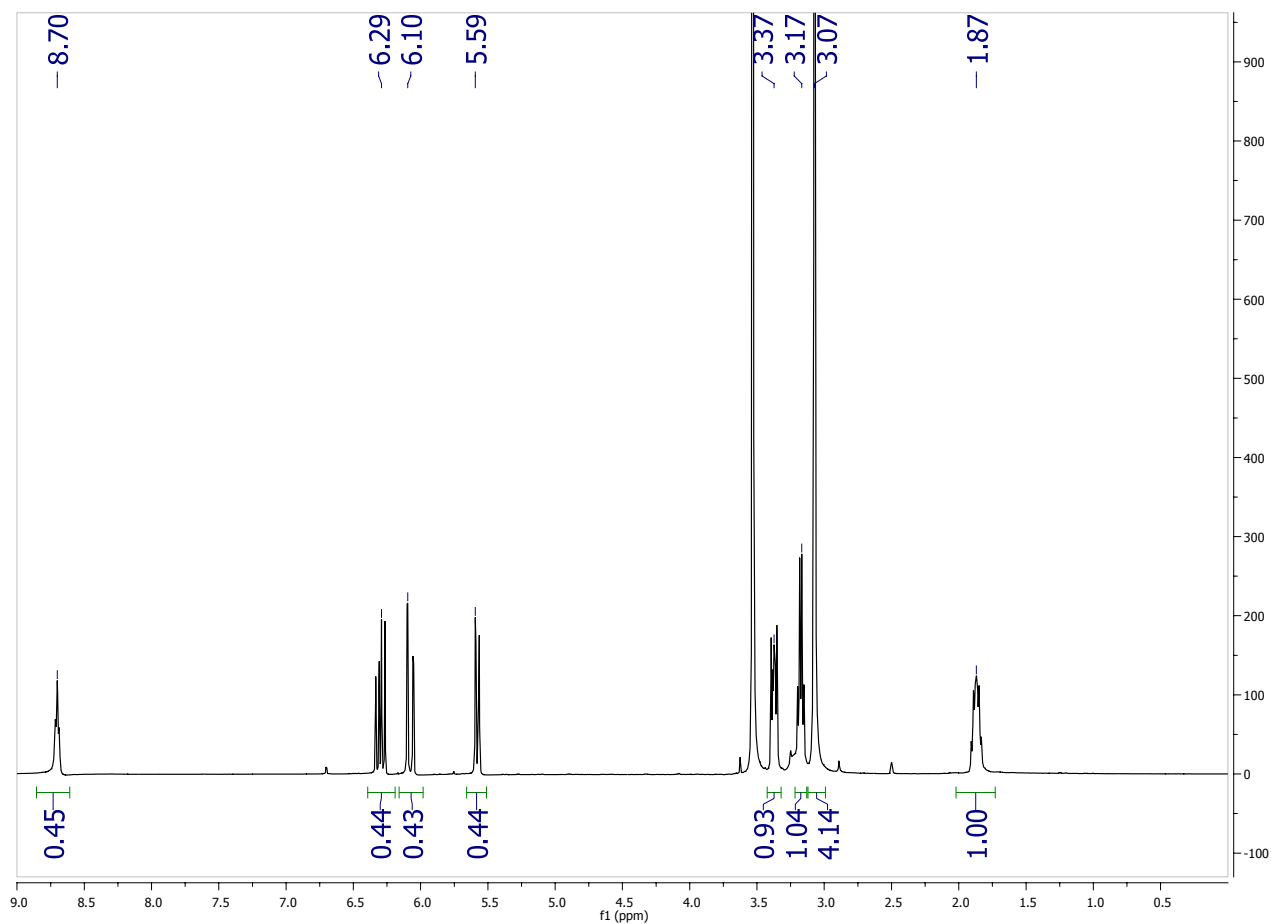

Signals of APTAC at 1.87 ppm ( $-\text{CH}_2-\text{CH}_2-\text{CH}_2-$ ), 3.07 ppm ( $-\text{N}^+(\text{CH}_3)_3$ ), 3.17 ppm ( $-\text{NH}-\text{CH}_2-$ ), 3.37 ppm ( $-\text{CH}_2-\text{N}^+(\text{CH}_3)_3$ ), 5.59 ppm and 6.10 ppm ( $\text{CH}_2=$ ), 6.29 ppm ( $=\text{CH}-$ ), 8.70 ppm ( $-\text{NH}-$ ).

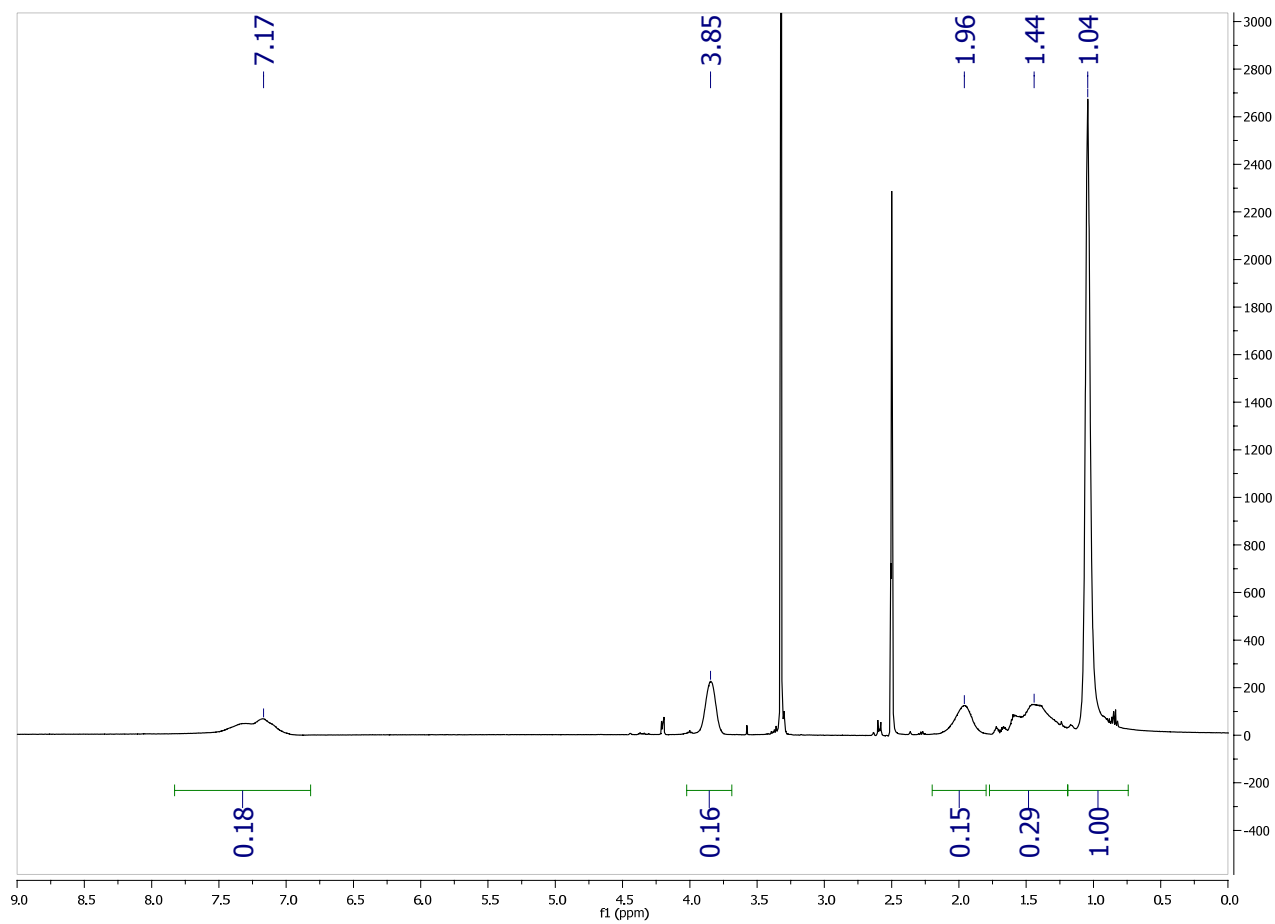

Signals of PNIPAAm at 1.04 ppm ( $-\text{CH}(\text{CH}_3)_2$ ), 1.44 ppm ( $\text{CH}_2-$ ), 1.96 ppm ( $\text{CH}_2-\text{CH}-$ ), 3.85 ppm ( $-\text{CH}(\text{CH}_3)_2$ ), 7.17 ppm ( $-\text{NH}-$ ).

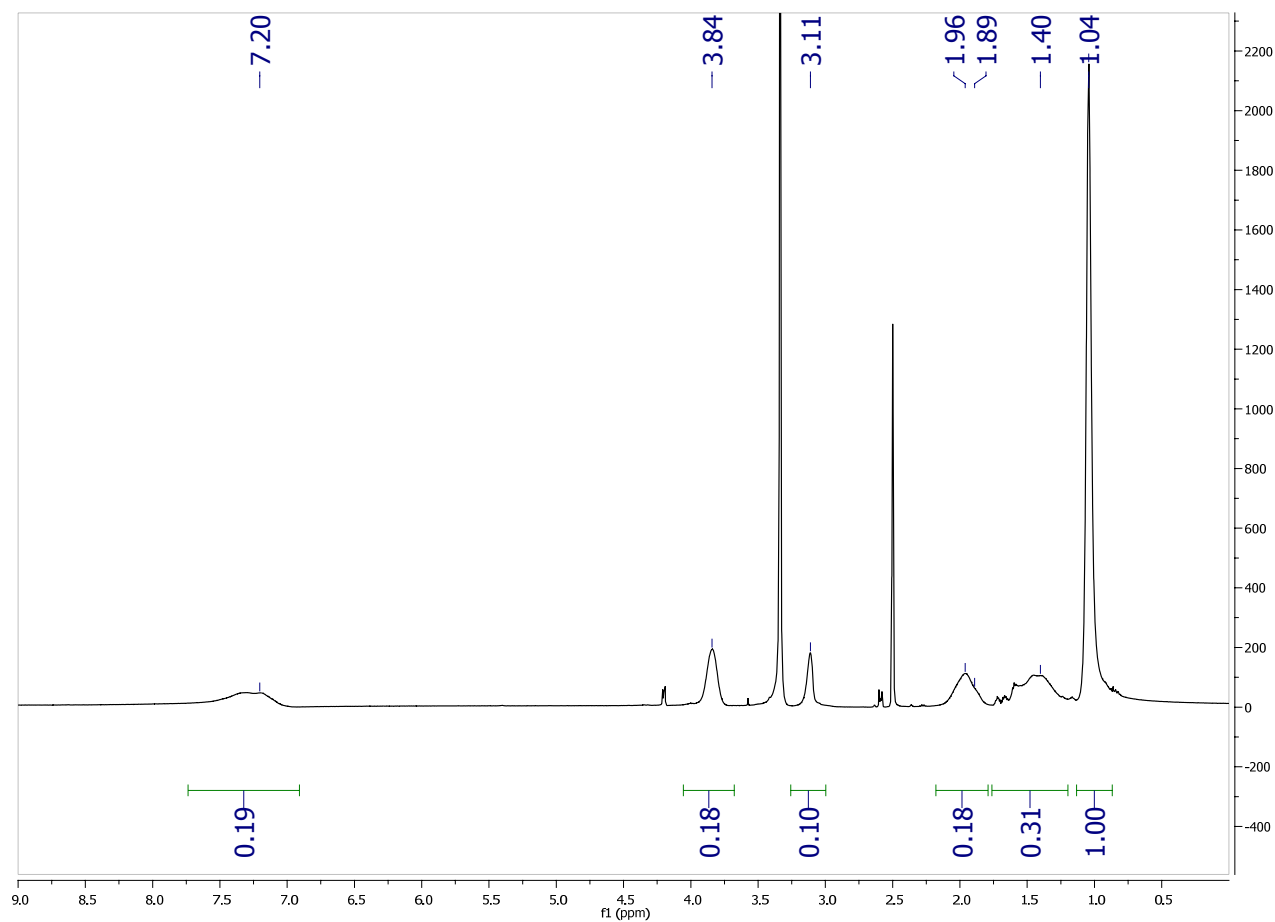

Signals of P(B30/30) at 1.04 ppm ( $-\text{CH}(\text{CH}_3)_2$ ) NIPAAm, 1.40 ppm ( $\text{CH}_2-$ ) NIPAAm and APTAC, 1.89 ppm ( $-\text{CH}_2-\text{CH}_2-\text{CH}_2-$ ) APTAC, 1.96 ppm ( $\text{CH}_2-\text{CH}-$ ) NIPAAm and APTAC, 3.11 ppm ( $-\text{CH}_2-\text{CH}_2-\text{CH}_2-\text{N}^+(\text{CH}_3)_3$ ) APTAC, 3.84 ppm ( $-\text{CH}(\text{CH}_3)_2$ ) NIPAAm, 7.20 ppm ( $-\text{NH}-$ ) NIPAAm and APTAC.

**Table 5.** Summary of how the dissipation changes with temperature both for the bare crystals and for the crystals with a single adsorbed polymer layer. The slope  $dD/dT$  for a quartz crystal with water has been subtracted from the  $dD/dT$  of a quartz crystal with a single layer of adsorbed polymer. The difference gives a measure of how the viscoelastic properties of the adsorbed polymer change with temperature in the interval 24-40°C.

| <b>Adsorbed polymer</b> | <b><math>dD/dT \cdot 10^6</math>, quartz crystal + water [K<sup>-1</sup>]</b> | <b><math>dD/dT \cdot 10^6</math>, quartz crystal + 1 layer polymer [K<sup>-1</sup>]</b> | <b><math>dD/dT \cdot 10^6</math>, 1 layer polymer [K<sup>-1</sup>]</b> |
|-------------------------|-------------------------------------------------------------------------------|-----------------------------------------------------------------------------------------|------------------------------------------------------------------------|
| <b>P(R15)</b>           | -1.595                                                                        | -1.6111                                                                                 | -0.0161                                                                |
| <b>P(B30/30)</b>        | -1.6275                                                                       | -2.002                                                                                  | -0.3745                                                                |
| <b>P(B60/20)</b>        | -1.6177                                                                       | -2.1189                                                                                 | -0.5012                                                                |
| <b>P(B20/60)</b>        | -1.6233                                                                       | -1.8351                                                                                 | -0.2118                                                                |
| <b>PEI</b>              | -1.6164                                                                       | -1.603                                                                                  | 0.0134                                                                 |
